# Supplementary material
Source: MDPI journal article supplement (https://www.mdpi.com/2073-4441/16/9/1245)
Supplement: s1 [file s1]

## **Supplementary Materials**

### **Occurrence and Risk Assessment of Perfluoroalkyl Substances in Surface Water of Hefei City, Southeast China**

**Table S1.** The full name, abbreviation, and commercial sources of individual PFASs and internal standards

| Full name                                                  | Abbreviation             | Purity     | Commercial sources       |
|------------------------------------------------------------|--------------------------|------------|--------------------------|
| Perfluorobutyric acid                                      | PFBA                     | HPLC grade | Alta Scientific Co, Ctd. |
| Perfluorovaleric acid                                      | PFPA                     | HPLC grade | Alta Scientific Co, Ctd. |
| Perfluorohexanoic acid                                     | PFHxA                    | HPLC grade | Alta Scientific Co, Ctd. |
| Perfluoroheptanoic acid                                    | PFHpA                    | HPLC grade | Alta Scientific Co, Ctd. |
| Perfluorooctanoic acid                                     | PFOA                     | HPLC grade | Alta Scientific Co, Ctd. |
| Perfluorononanoic acid                                     | PFNA                     | HPLC grade | Alta Scientific Co, Ctd. |
| Perfluorodecanoic acid                                     | PFDA                     | HPLC grade | Alta Scientific Co, Ctd. |
| Perfluorobutanesulfonic acid                               | PFBS                     | HPLC grade | Alta Scientific Co, Ctd. |
| Perfluorohexanesulfonic acid                               | PFHxS                    | HPLC grade | Alta Scientific Co, Ctd. |
| Perfluoroheptanesulfonic acid                              | PFHpS                    | HPLC grade | Alta Scientific Co, Ctd. |
| Perfluorooctanesulfonic acid                               | PFOS                     | HPLC grade | Alta Scientific Co, Ctd. |
| Perfluorohexanoic acid- $^{13}\text{C}_2$                  | PFHxA- $^{13}\text{C}_2$ | HPLC grade | Alta Scientific Co, Ctd. |
| Perfluorooctanoic acid-1,2,3,4- $^{13}\text{C}_4$          | PFOA- $^{13}\text{C}_4$  | HPLC grade | Alta Scientific Co, Ctd. |
| Sodium Perfluorooctanesulfonate-1,2,3,4- $^{13}\text{C}_4$ | PFOS- $^{13}\text{C}_4$  | HPLC grade | Alta Scientific Co, Ctd. |

**Table S2.** Specific geographic locations of sampling sites

| Site | Longitude | Latitude | Site | Longitude | Latitude |
|------|-----------|----------|------|-----------|----------|
| W1   | 117.1129  | 31.7846  | W12  | 117.4328  | 31.1596  |
| W2   | 117.2588  | 31.5023  | W13  | 117.1952  | 31.7107  |
| W3   | 117.2689  | 31.6469  | W14  | 117.3610  | 31.7496  |
| W4   | 117.6754  | 31.6653  | W15  | 117.3287  | 31.7628  |
| W5   | 117.4352  | 32.0246  | W16  | 117.2533  | 31.4367  |
| W6   | 117.2477  | 31.8795  | W17  | 117.3659  | 31.4768  |
| W7   | 117.0771  | 31.8029  | W18  | 117.3706  | 31.8068  |
| W8   | 117.8566  | 31.7837  | W19  | 117.5139  | 31.3558  |
| W9   | 117.1168  | 31.0999  | W20  | 117.7998  | 31.6602  |
| W10  | 117.4238  | 31.7606  | W21  | 118.7434  | 32.7174  |
| W11  | 117.4480  | 31.7834  | W22  | 117.2407  | 31.9265  |

**Table S3.** Structural information on the target and instrument parameter settings

| Analytes                                                           | Abbreviation                       | Molecular Formula                                                              | Parent ion ( $m/z$ ) | daughter ion ( $m/z$ ) | Collision Energy |
|--------------------------------------------------------------------|------------------------------------|--------------------------------------------------------------------------------|----------------------|------------------------|------------------|
| Perfluorobutyric acid                                              | PFBA                               | C <sub>4</sub> HF <sub>7</sub> O <sub>2</sub>                                  | 213                  | 169*<br>97             | 8<br>14          |
| Perfluorovaleric acid                                              | PFPA                               | C <sub>5</sub> HF <sub>9</sub> O <sub>2</sub>                                  | 263                  | 219*<br>69             | 6<br>46          |
| Perfluorohexanoic acid                                             | PFHxA                              | C <sub>6</sub> HF <sub>11</sub> O <sub>2</sub>                                 | 313                  | 269*<br>119            | 10<br>18         |
| Perfluoroheptanoic acid                                            | PFHpA                              | C <sub>7</sub> HF <sub>13</sub> O <sub>2</sub>                                 | 363                  | 169*<br>119            | 14<br>22         |
| Perfluorooctanoic acid                                             | PFOA                               | C <sub>8</sub> HF <sub>15</sub> O <sub>2</sub>                                 | 413                  | 169*<br>219            | 18<br>12         |
| Perfluorononanoic acid                                             | PFNA                               | C <sub>9</sub> HF <sub>17</sub> O <sub>2</sub>                                 | 463                  | 219*<br>169            | 14<br>16         |
| Perfluorodecanoic acid                                             | PFDA                               | C <sub>10</sub> HF <sub>19</sub> O <sub>2</sub>                                | 513                  | 219*<br>269            | 15<br>15         |
| Perfluorobutanesulfonic acid                                       | PFBS                               | C <sub>4</sub> HF <sub>9</sub> O <sub>3</sub> S                                | 299                  | 80*<br>99              | 30<br>26         |
| Perfluorohexanesulfonic acid                                       | PFHxS                              | C <sub>6</sub> HF <sub>13</sub> O <sub>3</sub> S                               | 399                  | 80*<br>99              | 38<br>34         |
| Perfluoroheptanesulfonic acid                                      | PFHpS                              | C <sub>7</sub> HF <sub>15</sub> O <sub>3</sub> S                               | 449                  | 80*<br>99              | 38<br>34         |
| Perfluorooctanesulfonic acid                                       | PFOS                               | C <sub>8</sub> HF <sub>17</sub> O <sub>3</sub> S                               | 499                  | 80*<br>99              | 52<br>36         |
| Perfluorohexanoic acid- <sup>13</sup> C <sub>2</sub>               | PFHxA <sup>13</sup> C <sub>2</sub> | <sup>13</sup> C <sub>2</sub> C <sub>4</sub> HF <sub>11</sub> O <sub>2</sub>    | 315                  | 270*<br>120            | 10<br>20         |
| Perfluorooctanoic acid-<br>1,2,3,4- <sup>13</sup> C <sub>4</sub>   | PFOA <sup>13</sup> C <sub>4</sub>  | <sup>13</sup> C <sub>4</sub> C <sub>4</sub> HF <sub>15</sub> O <sub>2</sub>    | 417                  | 169*<br>222            | 16<br>12         |
| Sodium                                                             |                                    |                                                                                |                      | 80*                    | 52               |
| Perfluorooctanesulfonate-<br>1,2,3,4- <sup>13</sup> C <sub>4</sub> | PFOS <sup>13</sup> C <sub>4</sub>  | <sup>13</sup> C <sub>4</sub> C <sub>4</sub> F <sub>17</sub> O <sub>3</sub> SNa | 503                  | 99                     | 36               |

\*: iron for quantification

**Table S4.** Concentration range and detection rate of PFASs in surface water (ng/L)

| Site      | PEBA  | PEPA   | PFHxA  | PFHnA | PEOA  | PFNA | PEDA | PFBS   | PFHxS | PFHnS | PFOS  | $\Sigma_{11}$ PFASs |
|-----------|-------|--------|--------|-------|-------|------|------|--------|-------|-------|-------|---------------------|
| W1        | 6.18  | 4.72   | 10.22  | 2.82  | 28.60 | 2.90 | 1.37 | 102.20 | 0.07  | ND    | 2.85  | 161.93              |
| W2        | 3.72  | 4.71   | 9.89   | 5.05  | 16.00 | 2.78 | 0.61 | 2.65   | 1.47  | 2.10  | 38.70 | 87.68               |
| W3        | 4.08  | 4.12   | 7.02   | 3.11  | 11.30 | 6.94 | 2.71 | 14.10  | 0.53  | 0.06  | 10.40 | 64.37               |
| W4        | 6.53  | 3.00   | 6.53   | 4.32  | 13.50 | 3.22 | 0.52 | 7.27   | 1.08  | 0.09  | 3.98  | 50.04               |
| W5        | 24.00 | 4.51   | 7.99   | 3.32  | 14.40 | 1.95 | 0.66 | 5.13   | 0.44  | 0.02  | 2.46  | 64.88               |
| W6        | 4.28  | 5.81   | 8.17   | 2.21  | 32.00 | 2.47 | 1.07 | 8.98   | 0.11  | 0.23  | 5.06  | 70.38               |
| W7        | 15.80 | 12.40  | 11.30  | 3.92  | 10.30 | 4.41 | 0.95 | 20.90  | ND    | ND    | 1.15  | 81.13               |
| W8        | 2.00  | 0.81   | 1.63   | 1.19  | 5.29  | 1.94 | ND   | 0.47   | ND    | ND    | 0.56  | 13.89               |
| W9        | 28.10 | 26.00  | 18.40  | 6.50  | 8.61  | 3.85 | 1.39 | 77.00  | 0.42  | ND    | 2.85  | 173.12              |
| W10       | 33.10 | 6.19   | 8.80   | 2.76  | 13.20 | 2.51 | 0.98 | 10.60  | 0.12  | 0.12  | 2.98  | 81.36               |
| W11       | 6.19  | 3.94   | 7.12   | 3.26  | 13.60 | 3.16 | 0.83 | 9.46   | 0.27  | 0.20  | 15.20 | 63.23               |
| W12       | 99.20 | 193.80 | 183.40 | 7.96  | 53.20 | 3.90 | ND   | 3.44   | ND    | ND    | 0.60  | 545.50              |
| W13       | 5.63  | 3.07   | 8.16   | 1.91  | 7.95  | 1.98 | 0.98 | 20.10  | 0.61  | 0.39  | 8.88  | 59.63               |
| W14       | 3.04  | 1.37   | 3.35   | 1.50  | 7.46  | 1.97 | 0.35 | 6.04   | 0.13  | 0.06  | 2.80  | 28.05               |
| W15       | 2.64  | 1.09   | 2.63   | 1.29  | 6.72  | 1.68 | ND   | 7.14   | 0.17  | 0.03  | 1.93  | 25.29               |
| W16       | 4.21  | 2.18   | 4.53   | 2.45  | 25.2  | 2.91 | 0.88 | 2.97   | ND    | ND    | 0.62  | 45.95               |
| W17       | 1.97  | 1.08   | 1.93   | 1.57  | 7.19  | 3.65 | 1.12 | 0.80   | 0.13  | ND    | 0.89  | 20.33               |
| W18       | 15.8  | 1.44   | 3.28   | 1.24  | 8.21  | 1.80 | 0.80 | 2.91   | 0.24  | ND    | 2.43  | 38.15               |
| W19       | 2.14  | 1.30   | 2.77   | 1.92  | 7.75  | 3.00 | 0.69 | 2.38   | 0.058 | 0.10  | 0.93  | 23.04               |
| W20       | 3.86  | 2.75   | 6.48   | 3.18  | 13.30 | 3.40 | 0.87 | 3.92   | 0.019 | ND    | 0.59  | 38.37               |
| W21       | 1.06  | 0.26   | 3.10   | 0.78  | 3.78  | 1.07 | 0.38 | 0.99   | 0.23  | ND    | 1.05  | 12.70               |
| W22       | 1.62  | 0.45   | 1.78   | 1.03  | 4.41  | 1.46 | 0.38 | 1.30   | 0.25  | ND    | 0.36  | 13.04               |
| Detection | 100   | 100    | 100    | 100   | 100   | 100  | 86.4 | 100    | 81.8  | 50    | 100   | —                   |

ND: Not detected or lower than the LOQ.

**Table S5.** Risk quotients for PFOA, PFOS, PFNA, PFHxA and PFDA at each site

| Site | RQ( $\times 10^{-4}$ ) |       |      |       |      |
|------|------------------------|-------|------|-------|------|
|      | PFOA                   | PFOS  | PFNA | PFHxA | PFDA |
| W1   | 0.50                   | 1.14  | 0.29 | 1.05  | 1.24 |
| W2   | 0.28                   | 15.48 | 0.28 | 1.02  | 0.55 |
| W3   | 0.20                   | 4.16  | 0.69 | 0.72  | 2.46 |
| W4   | 0.24                   | 1.59  | 0.32 | 0.67  | 0.47 |
| W5   | 0.25                   | 0.98  | 0.20 | 0.82  | 0.60 |
| W6   | 0.56                   | 2.02  | 0.25 | 0.84  | 0.97 |
| W7   | 0.18                   | 0.46  | 0.44 | 1.16  | 0.86 |
| W8   | 0.09                   | 0.22  | 0.19 | 0.17  | 0.00 |
| W9   | 0.15                   | 1.14  | 0.39 | 1.90  | 1.26 |
| W10  | 0.23                   | 1.19  | 0.25 | 0.91  | 0.89 |
| W11  | 0.24                   | 6.08  | 0.32 | 0.73  | 0.75 |
| W12  | 0.93                   | 0.24  | 0.39 | 18.91 | 0.00 |
| W13  | 0.14                   | 3.55  | 0.20 | 0.84  | 0.89 |
| W14  | 0.13                   | 1.12  | 0.20 | 0.35  | 0.32 |
| W15  | 0.12                   | 0.77  | 0.17 | 0.27  | 0.00 |
| W16  | 0.44                   | 0.25  | 0.29 | 0.47  | 0.80 |
| W17  | 0.13                   | 0.35  | 0.37 | 0.20  | 1.02 |
| W18  | 0.14                   | 0.97  | 0.18 | 0.34  | 0.73 |
| W19  | 0.14                   | 0.38  | 0.30 | 0.29  | 0.63 |
| W20  | 0.23                   | 0.24  | 0.34 | 0.67  | 0.79 |
| W21  | 0.07                   | 0.42  | 0.11 | 0.32  | 0.35 |
| W22  | 0.08                   | 0.14  | 0.15 | 0.18  | 0.35 |
